# Supplementary material for: Evaluation of HBV-Like Circulation in Wild and Farm Animals from Brazil and Uruguay
Source: PubMed Central journal article supplement (PMC6695864; doi:10.3390/ijerph16152679), 2019-07-26
Supplement: ijerph-16-02679-s001.pdf [file ijerph-16-02679-s001.pdf]

**Table S1:** Nucleotide identity between hepadnavirus strains from domestic dogs and other species. Legend: The nucleotide identity matrix was constructed using a partial nucleotide sequence of pre-S/S (1125 nt) of HBV and related viruses. For each sequence used, the GenBank accession number and infected species are shown.

| <b>GenBank</b> | <b>Host</b>     | <b>Country</b> | <b>Nucleotide identity</b> |
|----------------|-----------------|----------------|----------------------------|
| KC832937       |                 |                | 98.4%                      |
| KC832935       |                 |                | 98.3%                      |
| KC832936       | Swine           | Brazil         | 97.8%                      |
| KC832938       |                 |                | 90.4%                      |
| AY344108       | Human (HBV A)   | Brazil         | 98.2%                      |
| EU304331       | Human (HBV A)   | Argentina      | 97.5%                      |
| EU185787       | Human (HBV A)   | Argentina      | 95.6%                      |
| AP007264       | Human (HBV G)   | Japan          | 92.3%                      |
| AF223955       | Human (HBV C2)  | Asian          | 92.1%                      |
| AY123424       | Human (HBV C1)  | China          | 92.1%                      |
| AB064312       | Human (HBV G)   | USA            | 92.1%                      |
| EF662049       | Human (HBV E)   | Ghana          | 90.4%                      |
| HM195113       | Human (HBV E)   | Angola         | 90.3%                      |
| AB602818       | Human (HBV B1)  | Japan          | 90.3%                      |
| AB104712       | Human (HBV D1)  | Egypt          | 89.9%                      |
| AB205126       | Human (HBV D2)  | Japan          | 89.5%                      |
| AY596111       | Human (HBV B2)  | Taiwan         | 89.2%                      |
| AB516393       | Human (HBV H)   | Mexico         | 87.0%                      |
| AB059659       | Human (HBV H)   | USA            | 86.7%                      |
| AF223963       | Human (HBV F1b) | Argentina      | 85.1%                      |
| AB166850       | Human (HBV F4)  | Bolivia        | 84.8%                      |
| JQ664502       |                 |                | 91.1%                      |
| FJ798095       | Gorilla         | Cameroon       | 90.9%                      |
| JQ664503       |                 |                |                            |
| Y17563         |                 |                | 90.7%                      |
| Y17565         | Orangutan       | Indonesia      | 90.7%                      |
| Y17562         |                 |                | 90.3%                      |
| FJ798099       |                 |                | 90.5%                      |
| FJ798098       | Chimpanzee      | Cameroon       | 90.3%                      |
| AF222322       |                 | London         | 90.3%                      |
| AF477487       |                 |                | 90.4%                      |
| AF477491       | Gibbon          | Thailand       |                            |
| AF477489       |                 |                | 89.9%                      |
| AF046996       | Woolly Monkey   | EUA            | 76.2%                      |
| AY226578       |                 |                | 76.1%                      |
| MH307930       | Domestic cat    | Australia      | 64.4%                      |
| KC790375       |                 |                | 57.3%                      |
| KC790374       | Bat             | Gabon          | 57.3%                      |
| KC790373       |                 |                | 57.1%                      |
| U29144         |                 | Alaska         | 51.2%                      |
| NC 001484      | Ground Squirrel | USA            | 50.8%                      |
| K02715         |                 |                | 50.8%                      |
| FM212013       |                 |                | 50.8%                      |
| FM212015       | Woodchuck       | EUA            | 50.5%                      |

**Table S2.** Serological results of positive animals for hepadnavirus DNA (PCR).

| Groups | Species                       | N°            | Serological result |         |   |   |
|--------|-------------------------------|---------------|--------------------|---------|---|---|
|        |                               |               | Anti-HBc total     | HBsAg   |   |   |
| A      | <i>Sus scrofa</i>             | SM124         | -                  | -       |   |   |
|        | <i>Equus ferus caballus</i>   | HR26          | +                  | -       |   |   |
|        |                               | HR91          | -                  | -       |   |   |
|        |                               | HR95          | -                  | -       |   |   |
|        |                               | CN06          | -                  | -       |   |   |
|        |                               |               | CN13               | -       | - |   |
|        |                               |               | CN17               | -       | - |   |
|        |                               |               | CN60               | -       | - |   |
|        |                               |               | CN67               | -       | - |   |
|        |                               |               | CN70               | -       | - |   |
|        |                               |               | CN79               | -       | - |   |
|        |                               |               | CN83               | -       | - |   |
|        |                               |               | CN106              | -       | - |   |
| B      | <i>Canis lupus familiaris</i> | CNOX          | +                  | +       |   |   |
|        |                               | CD71          | -                  | -       |   |   |
|        |                               | CD83          | -                  | -       |   |   |
|        |                               | CD127         | -                  | -       |   |   |
|        |                               | CD131         | +                  | -       |   |   |
|        |                               | CD145         | -                  | -       |   |   |
|        |                               | <b>CD156*</b> | -                  | -       |   |   |
|        |                               | CD161         | +                  | -       |   |   |
|        |                               | CD179         | +                  | -       |   |   |
|        |                               | CD187         | -                  | -       |   |   |
|        |                               |               |                    | SSRS302 | - | - |
|        |                               | SSRS306       | -                  | -       |   |   |
| C      | <i>Sus scrofa</i>             | 5812          | -                  | -       |   |   |
|        |                               | 5814          | -                  | -       |   |   |
|        |                               | 5820          | -                  | +       |   |   |
|        |                               | 5841          | -                  | -       |   |   |
|        |                               | 5842          | -                  | -       |   |   |
|        |                               |               |                    | PCMC919 | - | - |
|        |                               |               |                    | BcTh941 | - | - |

\* Sequenced sample.

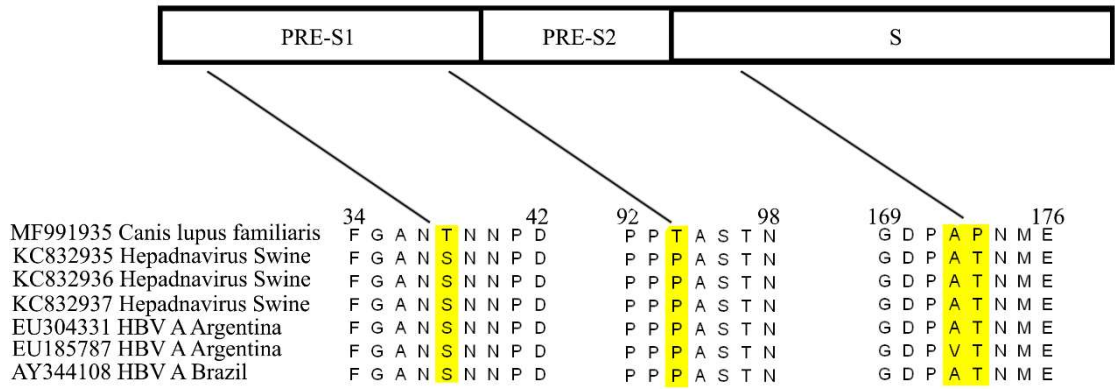

**Figure S1.** Schematic representation of the pre-S/S gene of HBV. The sequence shows three changes in the amino acids.
